# Supplementary material for: Adult phenotype of KCNQ2 encephalopathy
Source: HighWire-hosted journal article supplement (doi:10.1136/jmedgenet-2020-107449), 2021-04-02
Supplement: jmedgenet-2020-107449supp001_data_supplement.xlsx [file jmedgenet-2020-107449supp001_data_supplement.xlsx]

## Sheet: Table
Patient	Sex (M/F)	Age at last follow up (Y)	KCNQ2-variant: c.DNA, protein	Inheritance KCNQ2-variant	ACMG variant classification	Family history of seizures or ID	First signs of developmental delay (milestones if available)	Age at epilepsy onset	Age at epilepsy improvement	Age at epilepsy offset + Seizure free periods	Epilepsy at onset					Epilepsy during infancy-childhood-adolescence				Epilepsy during adulthood - last follow up				Neurological examination	Cognitive functioning and behaviour			Other clinical problems				Medical imaging	Medication
									Age at improvement epilepsy (if any)		Seizure type	Autonomic symptoms	Seizure frequency	EEG	ASM + Age + Efficacy	Seizure type	Seizure frequency	EEG	ASM + Age + Efficacy	Seizure type	Seizure frequency	EEG	ASM + Age + Efficacy	Neurological examination at last follow up (stereotypic movements, spasticity, speech, gait, etc.)	Cognitive functioning (ID, IQ, level of education, work)	Behavioural problems	Sleeping problems	Visual problems and abnormal eye movements	Cardiac problems	Feeding problems	Other	MRI brain abnormalities	Drugs taken at last follow-up (including non-ASM)
Patient 1	M	23	c.314_316delCCT, p.Ser105del	Inherited from mosaic mother	Likely pathogenic PM1, PM2, PM4, PP1, PP3, PP4, PP5	Mother (mosaic carrier KCNQ2 variant): neonatal seizures, highly educated, one epileptic seizure in 2019 Younger brother (also carrying KCNQ2 variant): neonatal seizures, ADHD, dyspraxia	5-6M 1Y: First words 19M: First steps	2nd day	1M	16Y 1M-15Y: seizure free	Focal impaired awareness seizures, Tonic seizures	Apnea, bradycardia	Daily several seizures (up to 10 times a day) 1M: seizure free	Discontinuous trace	PB: not effective VPA: effective, seizure free 7M: stop AED, seizure free	One episode with tonic-clonic seizures evolving to SE at 15Y	Single seizure episode at 15Y Seizure free from 15Y	15Y: Sporadically sharp waves right frontal 15Y: Normal 17Y: Normal	15Y: VPA, effective 16Y: LEV: effective, seizure free (aggression and tremor with VPA)	NA	NA	21Y: Normal	LEV: effective, seizure free	Stereotypies, increased tonus left arm and both legs, normal strength, motor dyspraxia, needs assistance with daily activities (dressing, washing, ...) Speech dyspraxia, nasal atactic speech, speaking short sentences, language difficult to understand, can read but not write Walking long distances, slightly broad-based with inversion of feet	Mild ID, concentration problems Special education	Autistic features	No	No	No	No	Shortened hamstrings and Achilles tendon both legs	NA Brain CT: normal	LEV
Patient 2	F	18	c.367G>A, p.Glu123Lys	De novo	Likely pathogenic PM1, PM2, PM6, PP2, PP3, PP4	No	Birth 5Y: Speech with few words, walking with aid 6Y: Regression in speech to no speech	1st day	3M	14Y	Myoclonic seizures, Asymmetric epileptic spasms with eyelid myoclonia	No	Daily several seizures	Right temporoparietal epileptiform activity	PB: not effective CBZ + CLB: effective, seizure reduction CBZ: effective	Tonic-clonic seizures	4Y: Frequently 5,5Y: Rarely Seizure free from 14Y	15Y: Awake: Rare right central spikes, Asleep: Right posterior spike-waves complexes	CBZ: ineffective 5,5Y: CBZ + LEV: effective, seizure reduction 14Y: CBZ + LEV: effective, seizure free	NA	NA	NA	CBZ + LEV: effective, seizure free	Axial hypotonia, pyramidal signs and spasticity lower limbs, reduced fine motor skills No speech, understanding few simple orders Walking with assistance	Severe ID No education	Autistic features	No	No	No	No	Obstipation Precocious puberty	Birth: Normal 2Y: Normal	CBZ + LEV
Patient 3	F	45	c.619C>T, p.Arg207Trp	De novo	Pathogenic PM1,PM2, PM5, PM6, PP2, PP3, PP4, PP5	No	Birth 16M: Walking	1st day	3M	40Y 2,5Y-6Y: seizure free, 13Y-22Y: seizure free	Tonic seizures, eye deviation, Opisthotonus	Apnea, cyanosis	Daily several seizures 3M: Occasionally with fever	Unknown	3W: PHT + PB, effective, seizure reduction	Tonic-clonic seizures, Focal seizures	Rarely	Unknown	PB + PHT: effective, seizure free (tapered off at 2,5Y) 6Y: CBZ: effective, eventually seizure free 13Y: stop AED	Tonic-clonic seizures, SE, Focal seizures	Rarely Seizure free from 13Y-22Y and from 40Y	23Y: Focal slowing and frequent 3-4Hz sharp waves bilaterally frontotemporal, 3Hz sharp waves left temporal, asynchronously 23Y: Bursts of diffuse 5-6Hz activity 37Y: 3,5-4Hz activity with rare sharp waves left frontotemporal and bilaterally frontal 39Y: Sporadic spikes and sharp waves frontotemporal	22Y: LTG: stopped because of allergic reaction 22Y: OXC: effective, seizure free but stopped because of hyponatremia 23Y: SE treated with PHT, effective 23Y: GBP + VPA: effective, seizure reduction Later: GBP + CBZ: seizure free since 40Y	Normal with slight spasticity	Moderate ID Special education, works in sheltered workshop	No	No	No	No	No	No	Birth: normal brain CT 23Y: Normal 38Y: Normal	GBP + CBZ
Patient 4	M	24	c.619C>T, p.Arg207Trp	Unknown	Pathogenic PM1,PM2, PM5, PM6, PP2, PP3, PP4, PP5	Mother: Mental retardation and possible Childhood Absence Epilepsy (no detailed info available)	Birth	3th day	Unknown	Not seizure free	Tonic–clonic seizures	Apnea	Unknown	3M: Focal and paroxysmal 4-5 Hz sharp waves mid temporal with left predominance	VPA, TPM, LTG: not effective CBZ: not effective, aggravation	Focal to bilateral tonic–clonic seizures, Seizures with reduced awareness of unknown onset	Monthly	4Y: Normal 13Y: Bilateral 2-4Hz sharp waves temporal 17Y: Diffuse slow activity	VPA + TPM: not effective	Focal seizures	Monthly	17Y: Diffuse slow waves 4-5,5 Hz	VPA + TPM: effective, seizure reduction	Ataxia Speech and walking possible	Moderate ID Special education, works in sheltered workshop	Autistic features Aggressive behaviour Destructive behaviour with self-injury	No	No	No	No	Bilateral calcaneus valgus	7Y: Ischemic abnormalities in white matter bioccipital, slight atrophy temporal horn right lateral ventricle 11Y: Minor thalamic hemorrhage	VPA + TPM + OLAN
Patient 5	F	33	c.619C>T, p.Arg207Trp	De novo	Pathogenic PM1, PM2, PM5, PM6, PP2, PP3, PP4, PP5	Son (also carrying KCNQ2 variant): Epilepsy at age of 2 weeks , developmental delay	Birth 3Y: Speaking	2M	4M	22Y 4M-13Y: seizure free	Tonic seizures	Unknown	Unknown	Right temporal epileptiform activity	LTG: effective, seizure free period	14Y: Nocturnal focal seizures, Focal to bilateral tonic-clonic seizures	Monthly	Unknown	LTG: effective, seizure reduction	Focal impaired awareness seizures Focal to bilateral tonic-clonic seizures	Monthly Seizure free from 22Y	20Y: Epileptic paroxysms right frontotemporal	LTG: effective, seizure free	Slightly dysarthric and nasal speech Normal gait	Mild ID Special education, Half-time supervised work as volunteer in retirement home	Autistic features Aggressive behaviour (during adolescence) Anxiety attacks Hyperventilation	Nocturnal restlessness, waking up a lot	No	No	No	Premature (37W)	20Y: Normal	LTG
Patient 6	F	28	c.629G>C, p.Arg210Pro	De novo	Pathogenic PM1, PM2, PM5, PM6, PP2, PP3, PP4, PP5	Paternal uncle: Seizures from 10Y-13Y	Birth	2nd day	2,5Y	20Y	Tonic–clonic seizures	Cyanosis	Daily	Unknown	D2-1M: PHT: effective, seizure reduction 2M: PHT + PB: effective, seizure reduction	Tonic–clonic seizures	Weekly	Multifocal polyspikes, spike-wave complexes temporal and frontal-central	PHT 7Y: stop PHT 7Y-15Y: LTG + PB 15Y-18Y: LTG + PB + LOR: effective, seizure reduction	Tonic-clonic seizures	Monthly Seizure free from 20Y	Polyspikes, spike-wave complexes, slow waves occipital, temporal, frontal and parietal cortex	19Y: stop PB 20Y: LTG + LOR + VPA: effective, seizure free	Spastic tetraplegia No speech, no communication No walking, wheelchaired	Severe ID Special education	Autistic features	No	Strabismus convergens	No	Dysphagia	No	2Y: Severe atrophy frontal and insular cortex 4Y: Severe atrophy frontal and insular cortex	VPA + LTG + LOR
Patient 7	F	21	c.740C>T, p.Ser247Leu	De novo	Pathogenic PM1, PM2, PM5, PM6, PP2, PP3, PP4, PP5	Paternal uncle: Febrile seizures at age < 1Y until 5Y, no ID Paternal aunt: Seizures as a child, no ID	Birth 1M: Lifting head 2M: Turning back-to-front 5M: Sitting alone 10M: First word 1Y: Gross motor delay, walking 18M: Cognitive level of 9-10M	1st day	1Y	1Y	Focal tonic seizures, SE	Cyanosis	Daily	Continuous epileptic activity	PB + PHT: effective, seizure reduction	NA	Seizure free from 1Y	1Y: Normal	PB, PHT, LTG 1Y: stop AED	NA	NA	19Y: Normal	NA	Dystonic posturing, drooling, clumsy, pyramidal signs, strength 4/5, needs assistance in most activities and daily life No coherent speech, no sentences, 1000 words, pointing things to communicate, not answering most questions, regression in periods of no sleep Walking with stroller	Severe ID No education	Autism Aggressive outbursts Destructive behaviour with self-injury Anxiety	Insomnia	No	No	No	Obstipation	10Y: Normal	MIR + RIS + MEL
Patient 8	M	24	c.793G>A, p.Ala265Thr	De novo	Pathogenic PM1, PM2, PM5, PM6, PP2, PP3, PP4, PP5	No	Birth	2nd day	9M	8Y	Focal tonic seizures, Focal clonic seizures	Apnea, cyanosis	Daily 6M-9M: Weekly 9M-12M: Monthly	Burst suppression, Multifocal polyspikes (> posterior)	0M-8M: PB, VGB, CLB: not effective 8M: CBZ: effective	Focal tonic seizures, Epileptic spasms	1Y-8Y: Monthly Seizure free from 8Y	Bilateral posterior polyspikes, theta and delta activity	9M-8Y: CBZ: effective, eventually seizure free Later stop AED	NA	NA	24Y: Mild diffuse slow activity	NA	Axial hypotonia, tetraparesis with pyramidal signs Dysarthria, poor eye contact, no speech only noises, sufficient comprehension No walking, wheelchaired	Profound ID Special education	Autistic features	Severe (during first years of life)	Cortical blindness	No	No	No	2M: Normal 6M: Wide ventricles	None
Patient 9	M	18	c.886A>C, p.Thr296Pro	De novo	Pathogenic PS2, PM1,PM2, PP2, PP4, PP5, BP4	No	Birth: Neonatal hypotonia, less responsive, abnormal duration of breast feeding	2nd day	1,5Y	13Y D19-6M: seizure free	Bilateral tonic seizures (upper limbs)	Cyanosis	Daily several seizures	Posterior predominant spikes	D2: PB: not effective PB + PHT: effective Withdrawal at D13 D13: VPA: effective, seizure free	Staring and tonic eye deviation	1,5Y-3Y: Rarely (once or twice a year) 3Y-10Y: Rarely (once a year) Seizure free from 13Y	3Y, 4Y, 5Y: Bilateral posterior interictal spikes 13Y: Normal	4Y: LTG: not effective 5Y: LTG + OXC: not effective 7Y: LTG + STM: not effective 10Y: LTG: effective, seizure free	NA	NA	NA	LTG: effective, seizure free	Stereotypic movements (repetitive activities), No speech (language is acquired but not used), good comprehension, no writing, occupational therapy with very little autonomy Normal gait	Severe ID No education	Severe autism	No	No	No	No	No	5Y: Normal	LTG
Patient 10	M	20	c.997C>T, p.Arg333Trp	De novo	Pathogenic PM1, PM2, PM5, PM6, PP2, PP3, PP4, PP5	Father: Febrile seizures Two brothers: Febrile seizures Maternal aunt: Juvenile tonic-clonic seizures	Birth 1Y: Hypotonia 4Y: Walking and first words	1st day	15M	18Y 1Y3M-3Y: seizure free, 3Y-10Y: seizure free	Focal impaired awareness seizures evolving to generalized tonic seizures with eyelid myoclonia	Apnea, cyanosis	Daily several seizures (up to 25 times a day)	1,5M: Bilateral central to frontocentral or frontoparietal epileptiform activity	1M: PB, VPA, PHT, VGB, STM, CBZ: not effective 2M: LTG: effective, seizure reduction 2M: TPM: effective, seizure free	15M: Focal tonic seizures to bilateral tonic-clonic seizures 10Y: Tonic-clonic seizures, Focal impaired awareness seizures	15M: Daily several seizures, Then: Weekly-monthly with seizure free periods	2Y: Normal 4-5Y: Multifocal epileptic activity	2Y3M: LTG + TPM: effective, seizure reduction 5Y: stop AED 10,5Y: CBZ, VPA: ineffective 10,5Y: RTG: effective, seizure reduction	NA	Seizure free from 18Y	20Y: Normal	18Y: RTG: effective, seizure reduction 18Y: CBZ: effective, seizure free (stop production RTG)	Severe visual impairment, reduced fine motor skills, brady-dysdiadochokinesis bilateral mild spasticity in both arms and legs Dysarthria, speaking few words Walking alone without assistance, atactic and spastic gait	Severe ID Special education	Temper tantrums Aggressive outbursts Destructive behaviour with self-injury and hurting others wherefore fixation was frequently needed in the wheelchair	Difficulties with falling asleep, waking up a lot (more in early childhood)	Severe visual impairment, strabismus convergens, amblyopia left eye, mild astigmatism	No	Difficulties with chewing (as a child)	Incontinence	1M: Normal 1Y: Dysplasia in right superior parietal area (retrorolandic)	CBZ + RIS + PN
Patient 11	F	42	c.1040A>C, p.Tyr347Ser	Unknown	Likely pathogenic PM1, PM2, PP2, PP3, PP4	Maternal aunt: Epilepsy	Birth	1st day	8Y	Not seizure free 8Y-20Y: seizure free	Myoclonic seizures, Tonic–clonic seizures, Opisthotonus	No	Daily	Burst suppression	CLB: effective PB: effective LEV: effective, seizure reduction	Focal seizures, Tonic-clonic seizures, Tonic seizures	Daily several seizures Seizure free from 8Y-20Y	Hypsarrhythmia, 10Y: Paroxysmal with frontal predominance	LEV: effective, seizure reduction VPA: effective, seizure free	Focal seizures, Myoclonic seizures	Daily several myoclonias Seizure free from 8Y-20Y	33Y: Multifocal spikes and polyspikes with right frontal predominance, secondary generalization of epileptic activity	LEV: effective, seizure reduction	Spastic tetraplegia No speech or walking	Severe ID No education	No	No	Visual impairment, bilateral n.opticus atrophy	No	PEG tube	Premature (34W) Suspected neonatal asphyxia and haemorrhage, but no brain imaging	NA	LEV
Patient 12	F	18	c.1678C>T, p.Arg560Trp	De novo	Pathogenic PM1, PM2, PM5, PM6, PP2, PP3, PP4, PP5	Unknown	Unknown	Unknown	Unknown	Not seizure free	Focal impaired awareness seizures	Unknown	Unknown	Unknown	Unknown	Focal impaired awareness seizures	Unknown	Unknown	Unknown	Focal impaired awareness seizures	18Y: Few break through seizures	Unknown	LTG: effective, seizure reduction	Stereotypic head movements, leg contractures at knees, quadriplegic paresis, variable tone, no ataxia, normal sensation No speech, good eye contact, yes/no with nodding, had several words but regression in speech secondary to seizures No walking, wheelchaired	Profound ID, IQ < 20 Special education	Autistic features	Insomnia	No	No	Dysphagia	Scoliosis Pes planus	Decrease in white matter e causa ignota	LTG + CLZ
Patient 13	F	22	c.1687G>A, p.Asp563Asn	De novo	Pathogenic PM1, PM2, PM5, PM6, PP2, PP3, PP4, PP5	No	Birth 6M: No turning back-to-front All milestones delayed	1st day	2Y	3Y Recurrence when stop AED at age 5Y and 19Y	Tonic seizures	No	Daily several seizures Later: Regularly (D10, 2M, 9M, 10M)	Focal spike-wave complexes 2M-1Y: Normal	PB: not effective D10: CBZ: effective, seizure reduction 10M: VPA: not effective, aggravation	Generalized tonic seizures, Epileptic spasms, Generalized tonic-clonic seizures	Exacerbation at 1Y and 2Y: Daily several seizures for few months Then: Occasional seizures Seizure free from 3Y-5Y and 5Y-18Y	1Y: Hypsarrhythmia 2Y: Slow background with multifocal epileptic activity 6Y: Normal 8Y: Frequent symmetrical epileptic activity, bilateral and predominantly central 12Y: Normal	1Y: VGB + CLZ: effective, seizure reduction 2Y: LTG + VPA: effective, seizure reduction especially after association of LTG 16Y: stop VPA	19Y: Generalized tonic-clonic seizures	19Y: Recurrence after stop AED, seizure free with AED	20Y: Normal	18Y: stop LTG with recurrence seizures 19Y: LEV: ineffective 19Y: VPA: effective, changed to LTG because of weight gain: effective, seizure free	Stereotypies, no spasticity, normal strength, incontinent Speaking short sentences Walking on toes	Severe ID No education	Autistic features Destructive behaviour with self-injury (during adolescence)	Difficulties with falling asleep, insomnia, bruxism, nocturnal restlessness, uncontrolled movements	No	No	No	Bruxism Incontinence, obstipation Pes planus, genu varum	2Y: Normal	LTG + CLZ
